# Supplementary material
Source: PubMed Central journal article supplement (PMC6251667)

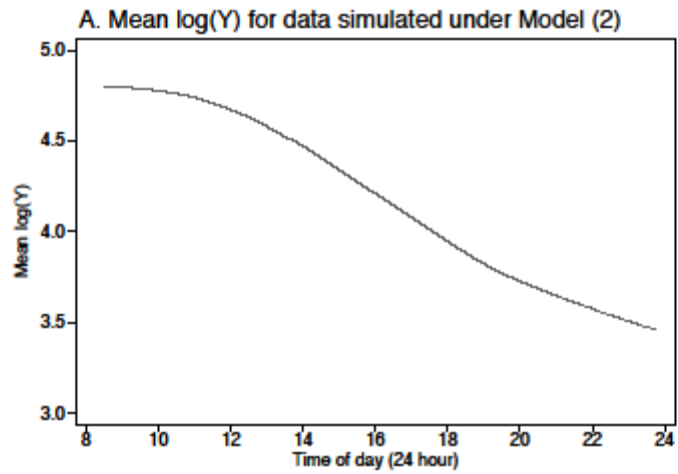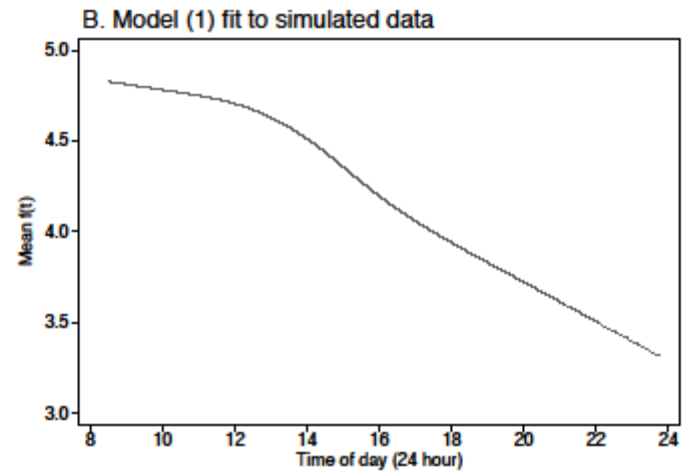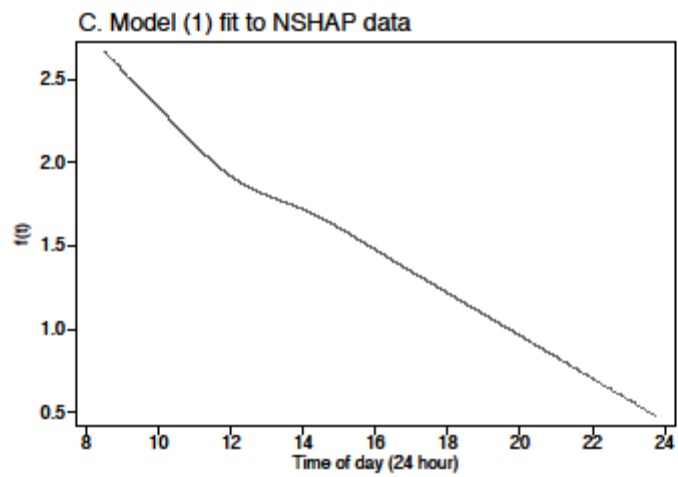

Supplement: zsx043_suppl_Appendix_Figure_1.pdf [file zsx043_suppl_Appendix_Figure_1.pdf]
